# Supplementary material for: Comparative Genomic Analysis Indicates that Niche Adaptation of Terrestrial Flavobacteria Is Strongly Linked to Plant Glycan Metabolism
Source: PLoS One. 2013 Sep 26;8(9):e76704. doi: 10.1371/journal.pone.0076704 (PMC3784431; doi:10.1371/journal.pone.0076704)
Supplement: Table S2 — Flavobacterial clade-specific proteins. Orthologs were defined by identifying unique pairwise reciprocal best hits, with at least 60% similarity in amino acid sequence and less than 30% difference in protein length. To determine the flavobacterial core genome, we used the 15 available genomes. For niche-specific core genome identification we used the completed genomes F . branchiophilum FL-15, F . psychrophilum JIP02/86; F . columnare ATCC 49512; F . indicum GPTSA100-9; F . johnsoniae UW101 and two draft genomes Flavobacterium sp. F52 and Flavobacterium sp. CF136. (XLSX) [file pone.0076704.s006.xlsx]

## Sheet: core_genes_of_rhyzosphre_clade_
Aquatic clade unique proteins		Flavobacterium core proteins		Soil clade unique proteins
NCBI Accession number	Protein function definition	NCBI Accession number	Protein function definition	NCBI Accession number	Protein function definition
YP 001296371.1	ABC-type iron(III) dicitrate-transport system component, TonB-dependent outer membrane receptor FecA	YP 001194201.1	(dimethylallyl)adenosine tRNA methylthiotransferase	YP 001196603.1	2'-5' RNA ligase
YP 001296085.1	acyl-CoA dehydrogenase	YP 001195180.1	2OG-Fe(II) oxygenase	YP 001194314.1	2OG-Fe(II) oxygenase
YP 001295463.1	alpha/beta fold family hydrolase	YP 001193606.1	2-oxoglutarate dehydrogenase, E2 subunit, dihydrolipoamide succinyltransferase	YP 001193439.1	3-oxoacyl-ACP synthase
YP 001295282.1	drug/metabolite-transporting permease	YP 001195103.1	30S ribosomal protein S1	YP 001196538.1	4Fe-4S ferredoxin
YP 001295382.1	elongation factor Ts (EF-Ts)	YP 001192753.1	30S ribosomal protein S10	YP 001196591.1	5-keto-4-deoxyuronate isomerase
YP 001297108.1	exporter	YP 001192728.1	30S ribosomal protein S11	YP 001196447.1	5-oxopent-3-ene-1,2,5-tricarboxylate decarboxylase
YP 001295206.1	hypothetical protein	YP 001192729.1	30S ribosomal protein S13	YP 001197018.1	6-phosphogluconolactonase
YP 001295346.1	hypothetical protein	YP 001192739.1	30S ribosomal protein S14	YP 001192680.1	ABC transporter-like protein
YP 001295424.1	hypothetical protein	YP 001193796.1	30S ribosomal protein S15	YP 001192826.1	ABC transporter-like protein
YP 001295618.1	hypothetical protein	YP 001192748.1	30S ribosomal protein S19	YP 001193681.1	ABC transporter-like protein
YP 001295642.1	hypothetical protein	YP 001192746.1	30S ribosomal protein S3	YP 001196642.1	ABC transporter-like protein
YP 001295798.1	hypothetical protein	YP 001192727.1	30S ribosomal protein S4	YP 001192682.1	ABC-2 type transporter
YP 001295887.1	hypothetical protein	YP 001192735.1	30S ribosomal protein S5	YP 001193447.1	ABC-2 type transporter
YP 001296414.1	hypothetical protein	YP 001192755.1	30S ribosomal protein S7	YP 001196612.1	acriflavin resistance protein
YP 001296416.1	hypothetical protein	YP 001196831.1	3-deoxy-D-manno-octulosonate cytidylyltransferase	YP 001194059.1	activator of Hsp90 ATPase 1 family protein
YP 001296424.1	hypothetical protein	YP 001197071.1	3-hydroxyacyl-CoA dehydrogenase	YP 001194494.1	activator of Hsp90 ATPase 1 family protein
YP 001296447.1	hypothetical protein	YP 001195781.1	3-hydroxybutyryl-CoA dehydrogenase	YP 001194495.1	activator of Hsp90 ATPase 1 family protein
YP 001296755.1	hypothetical protein	YP 001197029.1	3-methyl-2-oxobutanoate hydroxymethyltransferase	YP 001195169.1	activator of Hsp90 ATPase 1 family protein
YP 001296757.1	hypothetical protein	YP 001193241.1	3-oxoacid CoA-transferase subunit A	YP 001197021.1	activator of Hsp90 ATPase 1 family protein
YP 001296857.1	hypothetical protein	YP 001193240.1	3-oxoacid CoA-transferase subunit B	YP 001195727.1	acyl-CoA oxidase
YP 001297066.1	hypothetical protein	YP 001192610.1	3-oxoacyl-ACP synthase	YP 001195720.1	acyltransferase
YP 001297150.1	hypothetical protein	YP 001194810.1	4Fe-4S ferredoxin	YP 001197330.1	adenylylsulfate kinase
YP 001297179.1	hypothetical protein	YP 001193083.1	4-hydroxyphenylpyruvate dioxygenase	YP 001194066.1	ADP-heptose--LPS heptosyltransferase-like protein
YP 001297240.1	hypothetical protein	YP 001194291.1	50S ribosomal protein L1	YP 001194341.1	alanine racemase
YP 001296855.1	inward rectifier potassium channel Irk	YP 001194290.1	50S ribosomal protein L11	YP 001195182.1	alcohol dehydrogenase
YP 001296880.1	membrane-bound lytic murein transglycosylase	YP 001193963.1	50S ribosomal protein L13	YP 001196446.1	alcohol dehydrogenase
YP 001296354.1	purine nucleoside phosphorylase	YP 001192742.1	50S ribosomal protein L14	YP 001194849.1	aldo/keto reductase
YP 001297191.1	thioredoxin family protein	YP 001192745.1	50S ribosomal protein L16	YP 001193467.1	aldose 1-epimerase
YP 001295636.1	transcription termination factor Rho	YP 001192736.1	50S ribosomal protein L18	YP 001193474.1	aldose 1-epimerase
YP 001295943.1	uracil-DNA glycosylase	YP 001192384.1	50S ribosomal protein L20	YP 001193600.1	alkyl hydroperoxide reductase/ Thiol specific antioxidant/ Mal allergen
YP 001296370.1	vitamin K-dependent gamma-carboxylase	YP 001192747.1	50S ribosomal protein L22	YP 001195716.1	alkyl hydroperoxide reductase/ Thiol specific antioxidant/ Mal allergen
		YP 001193479.1	50S ribosomal protein L25	YP 001196471.1	alkyl hydroperoxide reductase/ Thiol specific antioxidant/ Mal allergen
		YP 001193897.1	50S ribosomal protein L27	YP 001196100.1	alkylated DNA repair protein-like protein
		YP 001192752.1	50S ribosomal protein L3	YP 001192386.1	alkylhydroperoxidase
		YP 001192734.1	50S ribosomal protein L30	YP 001192591.1	alpha/beta hydrolase
		YP 001192466.1	50S ribosomal protein L31	YP 001194518.1	alpha/beta hydrolase
		YP 001197300.1	50S ribosomal protein L33	YP 001194542.1	alpha/beta hydrolase
		YP 001192383.1	50S ribosomal protein L35	YP 001195082.1	alpha/beta hydrolase
		YP 001192740.1	50S ribosomal protein L5	YP 001192918.1	alpha/beta hydrolase fold protein
		YP 001194293.1	50S ribosomal protein L7/L12	YP 001194068.1	alpha/beta hydrolase fold protein
		YP 001196909.1	6-phosphofructokinase	YP 001194382.1	alpha-1,2-mannosidase
		YP 001194765.1	8-amino-7-oxononanoate synthase	YP 001194391.1	alpha-1,2-mannosidase
		YP 001192640.1	ABC transporter-like protein	YP 001195460.1	alpha-1,2-mannosidase
		YP 001192805.1	ABC transporter-like protein	YP 001195461.1	alpha-1,2-mannosidase
		YP 001196930.1	acetyl-CoA acetyltransferase	YP 001197265.1	alpha-galactosidase
		YP 001197073.1	acetyl-CoA acetyltransferase	YP 001194344.1	alpha-glucuronidase
		YP 001192998.1	acetyl-CoA carboxylase, biotin carboxylase	YP 001194378.1	alpha-L-fucosidase
		YP 001193813.1	acetyl-CoA carboxylase, carboxyl transferase subunit beta	YP 001194390.1	alpha-L-fucosidase
		YP 001193641.1	acyl-CoA dehydrogenase	YP 001196407.1	alpha-L-rhamnosidase
		YP 001197074.1	acyl-CoA dehydrogenase	YP 001196412.1	alpha-L-rhamnosidase
		YP 001194464.1	alkyl hydroperoxide reductase	YP 001196432.1	alpha-L-rhamnosidase
		YP 001192937.1	asparaginyl-tRNA synthetase	YP 001195464.1	alpha-N-acetylglucosaminidase
		YP 001193179.1	aspartate alpha-decarboxylase	YP 001193470.1	alpha-N-arabinofuranosidase
		YP 001193671.1	aspartate-semialdehyde dehydrogenase	YP 001194349.1	alpha-N-arabinofuranosidase
		YP 001193069.1	ATPase	YP 001195449.1	alpha-N-arabinofuranosidase
		YP 001194946.1	ATP-dependent metalloprotease FtsH	YP 001196444.1	amidohydrolase
		YP 001195095.1	ATP-dependent protease La	YP 001197186.1	aminopeptidase N-like protein
		YP 001193490.1	beta-ketoacyl synthase	YP 001196385.1	anaerobic ribonucleoside triphosphate reductase
		YP 001192801.1	beta-ketoacyl-acyl-carrier-protein synthase I	YP 001195071.1	ankyrin
		YP 001193538.1	beta-lactamase domain-containing protein	YP 001196394.1	ankyrin
		YP 001195243.1	bifunctional UDP-3-O-[3-hydroxymyristoyl] N-acetylglucosamine deacetylase/(3R)-hydroxymyristoyl-ACP dehydratase	YP 001195587.1	anti-FecI sigma factor FecR
		YP 001194029.1	carbonic anhydrase	YP 001194037.1	aromatic hydrocarbon degradation membrane protein
		YP 001194164.1	cell division protein FtsA	YP 001193899.1	AsmA family protein
		YP 001194193.1	chaperonin GroEL	YP 001196644.1	AsmA family protein
		YP 001193678.1	chromosome partitioning ATPase	YP 001195504.1	ATPase central domain-containing protein
		YP 001192722.1	citrate synthase I	YP 001195144.1	bacteriophage CI repressor
		YP 001194098.1	class I and II aminotransferase	YP 001194239.1	BadM/Rrf2 family transcriptional regulator
		YP 001192558.1	cobyrinic acid a,c-diamide synthase	YP 001197337.1	BadM/Rrf2 family transcriptional regulator
		YP 001194195.1	co-chaperonin GroES	YP 001196429.1	beta-galactosidase
		YP 001194729.1	CTP synthetase	YP 001197175.1	beta-glucosidase
		YP 001193064.1	cystathionine gamma-lyase	YP 001193433.1	beta-hydroxyacyl-(acyl-carrier-protein) dehydratase, FabA/FabZ
		YP 001193535.1	cysteine desulfurase activator complex subunit SufB	YP 001193445.1	beta-ketoacyl synthase
		YP 001194614.1	cysteinyl-tRNA synthetase	YP 001192854.1	beta-lactamase
		YP 001192769.1	cytoplasmic peptidoglycan synthetase domain-containing protein	YP 001197015.1	beta-lactamase
		YP 001194078.1	DegT/DnrJ/EryC1/StrS aminotransferase	YP 001194389.1	beta-N-acetylhexosaminidase
		YP 001194104.1	delta-1-pyrroline-5-carboxylate dehydrogenase	YP 001194395.1	BNR repeat-containing glycosyl hydrolase
		YP 001193310.1	delta-aminolevulinic acid dehydratase	YP 001196405.1	BNR repeat-containing glycosyl hydrolase
		YP 001195151.1	deoxyhypusine synthase	YP 001197264.1	cellulase
		YP 001194480.1	dihydrolipoamide dehydrogenase	YP 001194720.1	chaperone DnaJ domain-containing protein
		YP 001196994.1	dihydrolipoamide dehydrogenase	YP 001195684.1	CheB methylesterase
		YP 001192907.1	dihydroorotase	YP 001195852.1	coagulation factor 5/8 type domain-containing protein
		YP 001194557.1	dihydroorotate dehydrogenase 2	YP 001192446.1	cobalamin 5'-phosphate synthase
		YP 001194819.1	DNA topoisomerase IV subunit B	YP 001193776.1	ComEC/Rec2-like protein
		YP 001196911.1	DNA-binding/iron metalloprotein/AP endonuclease	YP 001193934.1	CRP/FNR family transcriptional regulator
		YP 001194295.1	DNA-directed RNA polymerase subunit beta'	YP 001196950.1	CRP/FNR family transcriptional regulator
		YP 001192908.1	dolichyl-phosphate beta-D-mannosyltransferase	YP 001194071.1	C-type lectin domain-containing protein
		YP 001194287.1	elongation factor Tu	YP 001194536.1	cupin
		YP 001197222.1	EmrB/QacA family drug resistance transporter	YP 001196624.1	cupin 2 domain-containing protein
		YP 001194053.1	endopeptidase Clp	YP 001192608.1	CutC family protein
		YP 001196905.1	endoribonuclease L-PSP	YP 001192385.1	cyclic nucleotide-binding protein
		YP 001196827.1	excinuclease ABC subunit A	YP 001192830.1	cyclic nucleotide-binding protein
		YP 001193411.1	F0F1 ATP synthase subunit alpha	YP 001196630.1	cyclic nucleotide-binding protein
		YP 001193172.1	F0F1 ATP synthase subunit beta	YP 001194713.1	cyclophilin type peptidyl-prolyl cis-trans isomerase
		YP 001193858.1	FAD-dependent pyridine nucleotide-disulfide oxidoreductase	YP 001194364.1	cytochrome c biogenesis protein, transmembrane region
		YP 001193591.1	ferredoxin	YP 001194010.1	cytochrome c oxidase subunit III
		YP 001193533.1	FeS assembly ATPase SufC	YP 001193311.1	cytochrome c551/c552-like protein
		YP 001192887.1	fructose-1,6-bisphosphatase	YP 001192689.1	DegT/DnrJ/EryC1/StrS aminotransferase
		YP 001193814.1	fructose-bisphosphate aldolase	YP 001196454.1	dehydratase
		YP 001197304.1	fumarylacetoacetate (FAA) hydrolase	YP 001192835.1	deoxyinosine 3'endonuclease-like protein
		YP 001192686.1	glucose-1-phosphate thymidylyltransferase	YP 001194213.1	diacylglycerol kinase catalytic subunit
		YP 001194265.1	glutamate-1-semialdehyde aminotransferase	YP 001195662.1	dihydrodipicolinate reductase
		YP 001194691.1	glutamine synthetase	YP 001193142.1	DinB family protein
		YP 001193364.1	glutaminyl-tRNA synthetase	YP 001193143.1	DinB family protein
		YP 001196908.1	glyceraldehyde-3-phosphate dehydrogenase, type I	YP 001194268.1	D-isomer specific 2-hydroxyacid dehydrogenase
		YP 001194908.1	glycine cleavage system aminomethyltransferase T	YP 001194825.1	DNA polymerase III subunit epsilon
		YP 001196773.1	glycine cleavage system aminomethyltransferase T	YP 001195081.1	DNA-(apurinic or apyrimidinic site) lyase
		YP 001193149.1	glycyl-tRNA synthetase	YP 001194891.1	DoxX family protein
		YP 001193013.1	glyoxalase/bleomycin resistance protein/dioxygenase	YP 001195059.1	DSBA oxidoreductase
		YP 001194616.1	GTP cyclohydrolase I	YP 001192428.1	ECF subfamily RNA polymerase sigma-24 factor
		YP 001194229.1	GTP-binding protein Era	YP 001192504.1	ECF subfamily RNA polymerase sigma-24 factor
		YP 001193139.1	GTP-binding protein LepA	YP 001192517.1	ECF subfamily RNA polymerase sigma-24 factor
		YP 001197253.1	GTP-binding protein TypA	YP 001192917.1	ECF subfamily RNA polymerase sigma-24 factor
		YP 001194813.1	GTP-dependent nucleic acid-binding protein EngD	YP 001193485.1	ECF subfamily RNA polymerase sigma-24 factor
		YP 001192615.1	heat shock protein 90	YP 001193626.1	ECF subfamily RNA polymerase sigma-24 factor
		YP 001193885.1	histone family protein DNA-binding protein	YP 001195093.1	ECF subfamily RNA polymerase sigma-24 factor
		YP 001193993.1	Holliday junction DNA helicase RuvB	YP 001196498.1	ECF subfamily RNA polymerase sigma-24 factor
		YP 001193728.1	Holliday junction resolvase	YP 001197276.1	endo-beta-mannanase-like protein
		YP 001193082.1	homogentisate 1,2-dioxygenase	YP 001197041.1	endonuclease I
		YP 001192838.1	hypothetical protein	YP 001192431.1	endonuclease/exonuclease/phosphatase
		YP 001193277.1	hypothetical protein	YP 001193916.1	endonuclease/exonuclease/phosphatase
		YP 001193397.1	hypothetical protein	YP 001193180.1	esterase
		YP 001193526.1	hypothetical protein	YP 001196580.1	esterase/lipase-like protein
		YP 001193995.1	hypothetical protein	YP 001196593.1	esterase/lipase-like protein
		YP 001194546.1	hypothetical protein	YP 001197048.1	exonuclease
		YP 001194787.1	hypothetical protein	YP 001196452.1	extracellular solute-binding protein
		YP 001196900.1	hypothetical protein	YP 001196646.1	FAD dependent oxidoreductase
		YP 001197321.1	hypothetical protein	YP 001193282.1	FAD-dependent pyridine nucleotide-disulfide oxidoreductase
		YP 001192382.1	initiation factor 3	YP 001195133.1	FAD-dependent pyridine nucleotide-disulfide oxidoreductase
		YP 001193536.1	iron-sulfur cluster assembly accessory protein	YP 001192506.1	FecR anti-FecI sigma factor
		YP 001193058.1	isoleucyl-tRNA synthetase	YP 001192518.1	FecR anti-FecI sigma factor
		YP 001193778.1	lipid-A-disaccharide synthase	YP 001196497.1	FecR anti-FecI sigma factor
		YP 001194273.1	lipoate-protein ligase B	YP 001193284.1	ferric uptake regulator family protein
		YP 001197035.1	LmbE family protein	YP 001196396.1	flavodoxin/nitric oxide synthase
		YP 001194602.1	malate dehydrogenase	YP 001195697.1	formamidopyrimidine-DNA glycosylase
		YP 001194081.1	malonyl CoA-acyl carrier protein transacylase	YP 001193306.1	fructose-1,6-bisphosphate aldolase
		YP 001192863.1	MazG nucleotide pyrophosphohydrolase	YP 001197283.1	GDSL family lipase
		YP 001194243.1	MerR family transcriptional regulator	YP 001193932.1	globin
		YP 001193319.1	metal dependent phosphohydrolase	YP 001196661.1	Glu/Leu/Phe/Val dehydrogenase
		YP 001192599.1	methenyltetrahydrofolate cyclohydrolase	YP 001195642.1	glucose sorbosone dehydrogenase
		YP 001194113.1	methionine aminopeptidase	YP 001192777.1	glucose/sorbosone dehydrogenase-like protein
		YP 001193210.1	methionyl-tRNA synthetase	YP 001194690.1	glutamate--ammonia ligase
		YP 001192371.1	methylmalonyl-CoA mutase	YP 001193129.1	glycoside hydrolase
		YP 001194678.1	methylmalonyl-CoA mutase	YP 001193131.1	glycoside hydrolase
		YP 001197357.1	MiaB-like tRNA modifying protein	YP 001193132.1	glycoside hydrolase
		YP 001197260.1	MiaB-like tRNA modifying protein YliG	YP 001195445.1	glycoside hydrolase
		YP 001192714.1	NAD-dependent epimerase/dehydratase	YP 001195447.1	glycoside hydrolase
		YP 001193594.1	NADH dehydrogenase (quinone)	YP 001195450.1	glycoside hydrolase
		YP 001193596.1	NADH dehydrogenase subunit B	YP 001195711.2	glycoside hydrolase
		YP 001195125.1	naphthoate synthase	YP 001196205.1	glycoside hydrolase
		YP 001193426.1	nifR3 family TIM-barrel protein	YP 001196401.1	glycoside hydrolase
		YP 001197294.1	nucleoside diphosphate kinase	YP 001196402.1	glycoside hydrolase
		YP 001194880.1	nucleoside triphosphate pyrophosphohydrolase	YP 001196415.1	glycoside hydrolase
		YP 001194289.1	NusG antitermination factor	YP 001196428.1	glycoside hydrolase
		YP 001194902.1	oligopeptidase B	YP 001196442.1	glycoside hydrolase
		YP 001195152.1	Orn/DAP/Arg decarboxylase 2	YP 001196574.1	glycoside hydrolase
		YP 001196975.1	ornithine aminotransferase	YP 001196576.1	glycoside hydrolase
		YP 001195780.1	oxidoreductase domain-containing protein	YP 001197075.1	glycoside hydrolase
		YP 001192551.1	PadR-like family transcriptional regulator	YP 001197271.1	glycoside hydrolase
		YP 001193711.1	peptidase dimerisation domain-containing protein	YP 001193128.1	glycoside hydrolase family 3 protein
		YP 001194899.1	peptide chain release factor 2	YP 001194392.1	glycoside hydrolase family 3 protein
		YP 001194298.1	peptide chain release factor 3	YP 001195722.1	glycoside hydrolase family 3 protein
		YP 001194878.1	peptide deformylase	YP 001196213.1	glycoside hydrolase family 3 protein
		YP 001193480.1	peptidyl-tRNA hydrolase	YP 001194752.2	glycosyl hydrolase
		YP 001193121.1	phenylalanyl-tRNA synthetase subunit alpha	YP 001193431.1	glycosyl transferase family protein
		YP 001193329.1	phosphoglycerate kinase	YP 001193730.1	glycosyl transferase family protein
		YP 001192723.1	phosphopyruvate hydratase	YP 001194222.1	glycosyl transferase family protein
		YP 001194808.1	phosphoserine aminotransferase	YP 001194861.1	glycosyl transferase family protein
		YP 001197224.1	polynucleotide adenylyltransferase	YP 001194060.1	glyoxalase/bleomycin resistance protein/dioxygenase
		YP 001194135.1	polyprenyl synthetase	YP 001195163.1	glyoxalase/bleomycin resistance protein/dioxygenase
		YP 001197322.1	preprotein translocase subunit SecA	YP 001195177.1	glyoxalase/bleomycin resistance protein/dioxygenase
		YP 001197257.1	prolyl-tRNA synthetase	YP 001195729.1	GntR family transcriptional regulator
		YP 001194892.1	propionyl-CoA carboxylase	YP 001195493.1	GPW/gp25 family protein
		YP 001192592.1	pseudouridine synthase	YP 001192654.1	group 1 glycosyl transferase
		YP 001197030.1	pseudouridine synthase	YP 001196639.1	group 1 glycosyl transferase
		YP 001194278.1	pyridoxal-5'-phosphate-dependent enzyme subunit beta	YP 001195741.1	guanosine 5'-monophosphate oxidoreductase
		YP 001193904.1	pyruvate dehydrogenase	YP 001193707.1	HAD family hydrolase
		YP 001192402.1	queuine tRNA-ribosyltransferase	YP 001195822.1	heat domain-containing protein
		YP 001192841.1	radical SAM domain-containing protein	YP 001196738.1	heat shock protein Hsp20
		YP 001197290.1	radical SAM domain-containing protein	YP 001193803.1	heavy metal transport/detoxification protein
		YP 001194133.1	radical SAM protein	YP 001192851.1	helix-turn-helix domain-containing protein
		YP 001193340.1	recA protein	YP 001193708.1	helix-turn-helix domain-containing protein
		YP 001192765.1	recombination factor protein RarA	YP 001194056.1	helix-turn-helix domain-containing protein
		YP 001195415.1	regulatory protein ArsR	YP 001195707.1	helix-turn-helix domain-containing protein
		YP 001196566.1	regulatory protein ArsR	YP 001195713.1	helix-turn-helix domain-containing protein
		YP 001196741.1	regulatory protein ArsR	YP 001196605.1	helix-turn-helix domain-containing protein
		YP 001193483.1	ribokinase-like domain-containing protein	YP 001196648.1	helix-turn-helix domain-containing protein
		YP 001193478.1	ribose-phosphate pyrophosphokinase	YP 001197270.1	helix-turn-helix domain-containing protein
		YP 001193783.1	ribulose-phosphate 3-epimerase	YP 001193141.1	helix-turn-helix, type 11 domain-containing protein
		YP 001193373.1	RNA-binding S1 domain-containing protein	YP 001194760.1	hemerythrin HHE cation binding domain-containing protein
		YP 001193809.1	rod shape-determining protein MreB	YP 001192585.1	histidine kinase
		YP 001193784.1	RpoD family RNA polymerase sigma factor	YP 001192991.1	histidine kinase
		YP 001193930.1	S-adenosyl-L-homocysteine hydrolase	YP 001193146.1	histidine kinase
		YP 001193840.1	S-adenosylmethionine synthetase	YP 001193972.1	histidine kinase
		YP 001192861.1	S-adenosylmethionine--tRNA ribosyltransferase-isomerase	YP 001195456.1	histidine kinase
		YP 001194154.1	S-adenosyl-methyltransferase MraW	YP 001194381.1	histidine kinase internal region
		YP 001195743.1	serine hydroxymethyltransferase	YP 001192395.1	histidine kinase, dimerisation and phosphoacceptor region
		YP 001193200.1	seryl-tRNA synthetase	YP 001193843.1	homoserine dehydrogenase
		YP 001194199.1	sigma-54 dependent trancsriptional regulator	YP 001197158.1	hyaluronan synthase
		YP 001197298.1	signal recognition particle-docking protein FtsY	YP 001196627.1	hydrophobe/amphiphile efflux-1 (HAE1) family protein
		YP 001195262.1	Sua5/YciO/YrdC/YwlC family protein	YP 001192372.1	hypothetical protein
		YP 001193030.1	succinate dehydrogenase flavoprotein subunit	YP 001192394.1	hypothetical protein
		YP 001193029.1	succinate dehydrogenase/fumarate reductase iron-sulfur subunit	YP 001192412.1	hypothetical protein
		YP 001195238.1	succinyl-CoA synthetase subunit alpha	YP 001192421.1	hypothetical protein
		YP 001194509.1	succinyl-CoA synthetase subunit beta	YP 001192422.1	hypothetical protein
		YP 001192940.1	thymidine kinase	YP 001192426.1	hypothetical protein
		YP 001193822.1	thymidylate synthase	YP 001192427.1	hypothetical protein
		YP 001193941.1	transcription elongation factor GreA	YP 001192433.1	hypothetical protein
		YP 001192406.1	transketolase, central region	YP 001192441.1	hypothetical protein
		YP 001193826.1	transketolase, central region	YP 001192452.1	hypothetical protein
		YP 001192731.1	translation initiation factor IF-1	YP 001192467.1	hypothetical protein
		YP 001193057.1	TraR/DksA family transcriptional regulator	YP 001192484.1	hypothetical protein
		YP 001194531.1	tRNA (guanine-N(1)-)-methyltransferase	YP 001192486.1	hypothetical protein
		YP 001193355.1	tRNA uridine 5-carboxymethylaminomethyl modification protein GidA	YP 001192500.1	hypothetical protein
		YP 001193900.1	tRNA--hydroxylase	YP 001192505.1	hypothetical protein
		YP 001194734.1	tRNA-specific 2-thiouridylase MnmA	YP 001192508.1	hypothetical protein
		YP 001197214.1	tryptophan synthase subunit beta	YP 001192516.1	hypothetical protein
		YP 001197365.1	two component sigma-54 specific Fis family transcriptional regulator	YP 001192545.1	hypothetical protein
		YP 001195793.1	two component transcriptional regulator	YP 001192550.1	hypothetical protein
		YP 001192488.1	UDP-N-acetylglucosamine 1-carboxyvinyltransferase	YP 001192553.1	hypothetical protein
		YP 001195242.1	UDP-N-acetylglucosamine acyltransferase	YP 001192554.1	hypothetical protein
		YP 001192368.1	uridine kinase	YP 001192594.1	hypothetical protein
		YP 001192928.1	uridylate kinase	YP 001192595.1	hypothetical protein
		YP 001193299.1	uroporphyrinogen decarboxylase	YP 001192596.1	hypothetical protein
		YP 001192910.1	uroporphyrinogen III synthase HEM4	YP 001192603.1	hypothetical protein
		YP 001194624.1	valyl-tRNA synthetase	YP 001192604.1	hypothetical protein
		YP 001192884.1	zinc-binding CMP/dCMP deaminase	YP 001192633.1	hypothetical protein
		YP 001193876.1	zinc-binding CMP/dCMP deaminase	YP 001192644.1	hypothetical protein
				YP 001192646.1	hypothetical protein
				YP 001192757.1	hypothetical protein
				YP 001192766.1	hypothetical protein
				YP 001192779.1	hypothetical protein
				YP 001192799.1	hypothetical protein
				YP 001192836.1	hypothetical protein
				YP 001192842.1	hypothetical protein
				YP 001192855.1	hypothetical protein
				YP 001192857.1	hypothetical protein
				YP 001192864.1	hypothetical protein
				YP 001192881.1	hypothetical protein
				YP 001192882.1	hypothetical protein
				YP 001192916.1	hypothetical protein
				YP 001192930.1	hypothetical protein
				YP 001192947.1	hypothetical protein
				YP 001192994.1	hypothetical protein
				YP 001192996.1	hypothetical protein
				YP 001193014.1	hypothetical protein
				YP 001193015.1	hypothetical protein
				YP 001193049.1	hypothetical protein
				YP 001193065.1	hypothetical protein
				YP 001193093.1	hypothetical protein
				YP 001193126.1	hypothetical protein
				YP 001193130.1	hypothetical protein
				YP 001193153.1	hypothetical protein
				YP 001193207.1	hypothetical protein
				YP 001193220.1	hypothetical protein
				YP 001193231.1	hypothetical protein
				YP 001193238.1	hypothetical protein
				YP 001193280.1	hypothetical protein
				YP 001193283.1	hypothetical protein
				YP 001193301.1	hypothetical protein
				YP 001193308.1	hypothetical protein
				YP 001193323.1	hypothetical protein
				YP 001193326.1	hypothetical protein
				YP 001193330.1	hypothetical protein
				YP 001193335.1	hypothetical protein
				YP 001193336.1	hypothetical protein
				YP 001193357.1	hypothetical protein
				YP 001193360.1	hypothetical protein
				YP 001193361.1	hypothetical protein
				YP 001193362.1	hypothetical protein
				YP 001193363.1	hypothetical protein
				YP 001193368.1	hypothetical protein
				YP 001193370.1	hypothetical protein
				YP 001193395.1	hypothetical protein
				YP 001193401.1	hypothetical protein
				YP 001193418.1	hypothetical protein
				YP 001193432.1	hypothetical protein
				YP 001193435.1	hypothetical protein
				YP 001193436.1	hypothetical protein
				YP 001193442.1	hypothetical protein
				YP 001193452.1	hypothetical protein
				YP 001193455.1	hypothetical protein
				YP 001193460.1	hypothetical protein
				YP 001193463.1	hypothetical protein
				YP 001193484.1	hypothetical protein
				YP 001193486.1	hypothetical protein
				YP 001193521.1	hypothetical protein
				YP 001193522.1	hypothetical protein
				YP 001193524.1	hypothetical protein
				YP 001193528.1	hypothetical protein
				YP 001193537.1	hypothetical protein
				YP 001193552.1	hypothetical protein
				YP 001193601.1	hypothetical protein
				YP 001193604.1	hypothetical protein
				YP 001193605.1	hypothetical protein
				YP 001193608.1	hypothetical protein
				YP 001193615.1	hypothetical protein
				YP 001193623.1	hypothetical protein
				YP 001193624.1	hypothetical protein
				YP 001193627.1	hypothetical protein
				YP 001193667.1	hypothetical protein
				YP 001193676.1	hypothetical protein
				YP 001193679.1	hypothetical protein
				YP 001193680.1	hypothetical protein
				YP 001193693.1	hypothetical protein
				YP 001193723.1	hypothetical protein
				YP 001193733.1	hypothetical protein
				YP 001193734.1	hypothetical protein
				YP 001193763.1	hypothetical protein
				YP 001193767.1	hypothetical protein
				YP 001193774.1	hypothetical protein
				YP 001193785.1	hypothetical protein
				YP 001193790.1	hypothetical protein
				YP 001193797.1	hypothetical protein
				YP 001193799.1	hypothetical protein
				YP 001193801.1	hypothetical protein
				YP 001193820.1	hypothetical protein
				YP 001193873.1	hypothetical protein
				YP 001193922.1	hypothetical protein
				YP 001193924.1	hypothetical protein
				YP 001193925.1	hypothetical protein
				YP 001193940.1	hypothetical protein
				YP 001194006.1	hypothetical protein
				YP 001194016.1	hypothetical protein
				YP 001194036.1	hypothetical protein
				YP 001194051.1	hypothetical protein
				YP 001194061.1	hypothetical protein
				YP 001194075.1	hypothetical protein
				YP 001194084.1	hypothetical protein
				YP 001194087.1	hypothetical protein
				YP 001194092.1	hypothetical protein
				YP 001194097.1	hypothetical protein
				YP 001194114.1	hypothetical protein
				YP 001194120.1	hypothetical protein
				YP 001194121.1	hypothetical protein
				YP 001194122.1	hypothetical protein
				YP 001194123.1	hypothetical protein
				YP 001194134.1	hypothetical protein
				YP 001194140.1	hypothetical protein
				YP 001194176.1	hypothetical protein
				YP 001194188.1	hypothetical protein
				YP 001194200.1	hypothetical protein
				YP 001194214.1	hypothetical protein
				YP 001194215.1	hypothetical protein
				YP 001194217.1	hypothetical protein
				YP 001194231.1	hypothetical protein
				YP 001194232.1	hypothetical protein
				YP 001194250.1	hypothetical protein
				YP 001194254.1	hypothetical protein
				YP 001194255.1	hypothetical protein
				YP 001194258.1	hypothetical protein
				YP 001194267.1	hypothetical protein
				YP 001194272.1	hypothetical protein
				YP 001194282.1	hypothetical protein
				YP 001194313.1	hypothetical protein
				YP 001194323.1	hypothetical protein
				YP 001194327.1	hypothetical protein
				YP 001194340.1	hypothetical protein
				YP 001194385.1	hypothetical protein
				YP 001194394.1	hypothetical protein
				YP 001194396.1	hypothetical protein
				YP 001194524.1	hypothetical protein
				YP 001194544.1	hypothetical protein
				YP 001194559.1	hypothetical protein
				YP 001194577.1	hypothetical protein
				YP 001194622.1	hypothetical protein
				YP 001194634.1	hypothetical protein
				YP 001194644.1	hypothetical protein
				YP 001194658.1	hypothetical protein
				YP 001194660.1	hypothetical protein
				YP 001194683.1	hypothetical protein
				YP 001194684.1	hypothetical protein
				YP 001194685.1	hypothetical protein
				YP 001194702.1	hypothetical protein
				YP 001194711.1	hypothetical protein
				YP 001194719.1	hypothetical protein
				YP 001194721.1	hypothetical protein
				YP 001194731.1	hypothetical protein
				YP 001194732.1	hypothetical protein
				YP 001194741.1	hypothetical protein
				YP 001194753.1	hypothetical protein
				YP 001194766.1	hypothetical protein
				YP 001194769.1	hypothetical protein
				YP 001194774.1	hypothetical protein
				YP 001194783.1	hypothetical protein
				YP 001194805.1	hypothetical protein
				YP 001194811.1	hypothetical protein
				YP 001194826.1	hypothetical protein
				YP 001194860.1	hypothetical protein
				YP 001194862.1	hypothetical protein
				YP 001194877.1	hypothetical protein
				YP 001194889.1	hypothetical protein
				YP 001194927.1	hypothetical protein
				YP 001194960.1	hypothetical protein
				YP 001194991.1	hypothetical protein
				YP 001194997.1	hypothetical protein
				YP 001195002.1	hypothetical protein
				YP 001195091.1	hypothetical protein
				YP 001195092.1	hypothetical protein
				YP 001195139.1	hypothetical protein
				YP 001195140.1	hypothetical protein
				YP 001195168.1	hypothetical protein
				YP 001195173.1	hypothetical protein
				YP 001195176.1	hypothetical protein
				YP 001195186.1	hypothetical protein
				YP 001195194.1	hypothetical protein
				YP 001195223.1	hypothetical protein
				YP 001195233.1	hypothetical protein
				YP 001195271.1	hypothetical protein
				YP 001195297.1	hypothetical protein
				YP 001195298.1	hypothetical protein
				YP 001195311.1	hypothetical protein
				YP 001195323.1	hypothetical protein
				YP 001195383.1	hypothetical protein
				YP 001195398.1	hypothetical protein
				YP 001195446.1	hypothetical protein
				YP 001195453.1	hypothetical protein
				YP 001195459.1	hypothetical protein
				YP 001195477.1	hypothetical protein
				YP 001195484.1	hypothetical protein
				YP 001195485.1	hypothetical protein
				YP 001195489.1	hypothetical protein
				YP 001195490.1	hypothetical protein
				YP 001195494.1	hypothetical protein
				YP 001195495.1	hypothetical protein
				YP 001195496.1	hypothetical protein
				YP 001195497.1	hypothetical protein
				YP 001195498.1	hypothetical protein
				YP 001195499.1	hypothetical protein
				YP 001195500.1	hypothetical protein
				YP 001195518.1	hypothetical protein
				YP 001195530.1	hypothetical protein
				YP 001195535.1	hypothetical protein
				YP 001195541.1	hypothetical protein
				YP 001195542.1	hypothetical protein
				YP 001195543.1	hypothetical protein
				YP 001195569.1	hypothetical protein
				YP 001195620.1	hypothetical protein
				YP 001195692.1	hypothetical protein
				YP 001195696.1	hypothetical protein
				YP 001195698.1	hypothetical protein
				YP 001195702.1	hypothetical protein
				YP 001195704.1	hypothetical protein
				YP 001195705.1	hypothetical protein
				YP 001195714.1	hypothetical protein
				YP 001195723.1	hypothetical protein
				YP 001195728.1	hypothetical protein
				YP 001195731.1	hypothetical protein
				YP 001195752.1	hypothetical protein
				YP 001195810.1	hypothetical protein
				YP 001195829.1	hypothetical protein
				YP 001195838.1	hypothetical protein
				YP 001195849.1	hypothetical protein
				YP 001195912.1	hypothetical protein
				YP 001196085.1	hypothetical protein
				YP 001196086.1	hypothetical protein
				YP 001196110.1	hypothetical protein
				YP 001196206.1	hypothetical protein
				YP 001196216.1	hypothetical protein
				YP 001196386.1	hypothetical protein
				YP 001196403.1	hypothetical protein
				YP 001196409.1	hypothetical protein
				YP 001196410.1	hypothetical protein
				YP 001196411.1	hypothetical protein
				YP 001196413.1	hypothetical protein
				YP 001196414.1	hypothetical protein
				YP 001196416.1	hypothetical protein
				YP 001196417.1	hypothetical protein
				YP 001196418.1	hypothetical protein
				YP 001196419.1	hypothetical protein
				YP 001196420.1	hypothetical protein
				YP 001196424.1	hypothetical protein
				YP 001196425.1	hypothetical protein
				YP 001196426.1	hypothetical protein
				YP 001196430.1	hypothetical protein
				YP 001196431.1	hypothetical protein
				YP 001196441.1	hypothetical protein
				YP 001196491.1	hypothetical protein
				YP 001196493.1	hypothetical protein
				YP 001196495.1	hypothetical protein
				YP 001196499.1	hypothetical protein
				YP 001196537.1	hypothetical protein
				YP 001196539.1	hypothetical protein
				YP 001196599.1	hypothetical protein
				YP 001196608.1	hypothetical protein
				YP 001196611.1	hypothetical protein
				YP 001196632.1	hypothetical protein
				YP 001196633.1	hypothetical protein
				YP 001196636.1	hypothetical protein
				YP 001196643.1	hypothetical protein
				YP 001196645.1	hypothetical protein
				YP 001196650.1	hypothetical protein
				YP 001196662.1	hypothetical protein
				YP 001196670.1	hypothetical protein
				YP 001196710.1	hypothetical protein
				YP 001196808.1	hypothetical protein
				YP 001196817.1	hypothetical protein
				YP 001196876.1	hypothetical protein
				YP 001196916.1	hypothetical protein
				YP 001196936.1	hypothetical protein
				YP 001196941.1	hypothetical protein
				YP 001196961.1	hypothetical protein
				YP 001196969.1	hypothetical protein
				YP 001196974.1	hypothetical protein
				YP 001196978.1	hypothetical protein
				YP 001196988.1	hypothetical protein
				YP 001197008.1	hypothetical protein
				YP 001197014.1	hypothetical protein
				YP 001197019.1	hypothetical protein
				YP 001197022.1	hypothetical protein
				YP 001197023.1	hypothetical protein
				YP 001197045.1	hypothetical protein
				YP 001197077.1	hypothetical protein
				YP 001197078.1	hypothetical protein
				YP 001197080.1	hypothetical protein
				YP 001197083.1	hypothetical protein
				YP 001197092.1	hypothetical protein
				YP 001197094.1	hypothetical protein
				YP 001197095.1	hypothetical protein
				YP 001197161.1	hypothetical protein
				YP 001197174.1	hypothetical protein
				YP 001197190.1	hypothetical protein
				YP 001197200.1	hypothetical protein
				YP 001197201.1	hypothetical protein
				YP 001197207.1	hypothetical protein
				YP 001197215.1	hypothetical protein
				YP 001197227.1	hypothetical protein
				YP 001197235.1	hypothetical protein
				YP 001197261.1	hypothetical protein
				YP 001197279.1	hypothetical protein
				YP 001197285.1	hypothetical protein
				YP 001197286.1	hypothetical protein
				YP 001197293.1	hypothetical protein
				YP 001197323.1	hypothetical protein
				YP 001197344.1	hypothetical protein
				YP 001197358.1	hypothetical protein
				YP 001195455.1	inositol oxygenase
				YP 001195942.1	insertion element protein
				YP 001196892.1	integral membrane sensor hybrid histidine kinase
				YP 001193684.1	integral membrane sensor signal transduction histidine kinase
				YP 001194307.1	integral membrane sensor signal transduction histidine kinase
				YP 001195219.1	integral membrane sensor signal transduction histidine kinase
				YP 001196838.1	integral membrane sensor signal transduction histidine kinase
				YP 001197287.1	integral membrane sensor signal transduction histidine kinase
				YP 001195022.1	IS1 transposase
				YP 001195944.1	IS1 transposase
				YP 001196026.1	IS1 transposase
				YP 001197036.1	isochorismate synthase
				YP 001194325.1	K+-transporting ATPase subunit B
				YP 001194034.1	kelch repeat-containing protein
				YP 001196587.1	keto-hydroxyglutarate-aldolase/keto-deoxy- phosphogluconate aldolase
				YP 001194057.1	lactoylglutathione lyase-like protein
				YP 001193473.1	L-arabinose isomerase
				YP 001193670.1	large conductance mechanosensitive channel protein
				YP 001196450.1	L-carnitine dehydratase/bile acid-inducible protein F
				YP 001196451.1	L-carnitine dehydratase/bile acid-inducible protein F
				YP 001196455.1	L-fucose transporter
				YP 001193472.1	L-ribulose-5-phosphate 4-epimerase
				YP 001194334.1	luciferase
				YP 001193226.1	LysR family transcriptional regulator
				YP 001196939.1	LysR family transcriptional regulator
				YP 001193328.1	lytic transglycosylase
				YP 001194030.1	LytTR family two component transcriptional regulator
				YP 001194185.1	LytTR family two component transcriptional regulator
				YP 001194380.1	LytTR family two component transcriptional regulator
				YP 001196609.1	LytTR family two component transcriptional regulator
				YP 001196882.1	LytTR family two component transcriptional regulator
				YP 001196992.1	LytTR family two component transcriptional regulator
				YP 001195089.1	major facilitator transporter
				YP 001196883.1	major facilitator transporter
				YP 001196518.1	mannonate dehydratase
				YP 001194264.1	mannosyl-glycoprotein endo-beta-N-acetylglucosamidase
				YP 001196361.1	MarR family transcriptional regulator
				YP 001193423.1	MATE efflux family protein
				YP 001197198.1	metal dependent phosphohydrolase
				YP 001197246.1	metal dependent phosphohydrolase
				YP 001192840.1	metal-dependent hydrolase
				YP 001195457.1	metallophosphoesterase
				YP 001193926.1	methylated-DNA--protein-cysteine methyltransferase
				YP 001196954.1	molybdenum cofactor biosynthesis protein A
				YP 001196962.1	molybdenum cofactor synthesis domain-containing protein
				YP 001196956.1	molybdopterin biosynthesis MoaE protein
				YP 001196951.1	molybdopterin oxidoreductase
				YP 001196960.1	molybdopterin-guanine dinucleotide biosynthesis protein A-like protein
				YP 001193947.1	MOSC domain-containing protein
				YP 001195690.1	MtN3 and saliva related transmembrane protein
				YP 001195687.1	multi-sensor hybrid histidine kinase
				YP 001197033.1	multi-sensor hybrid histidine kinase
				YP 001194662.1	multi-sensor signal transduction histidine kinase
				YP 001196945.1	multi-sensor signal transduction histidine kinase
				YP 001194387.1	N(4)-(beta-N-acetylglucosaminyl)-L-asparaginase
				YP 001194383.1	Na+/solute symporter
				YP 001193227.1	N-acetyltransferase GCN5
				YP 001193302.1	N-acetyltransferase GCN5
				YP 001194466.1	N-acetyltransferase GCN5
				YP 001195635.1	N-acetyltransferase GCN5
				YP 001195740.1	N-acetyltransferase GCN5
				YP 001195825.1	N-acetyltransferase GCN5
				YP 001196631.1	N-acetyltransferase GCN5
				YP 001197183.1	N-acetyltransferase GCN5
				YP 001197274.1	N-acylglucosamine 2-epimerase
				YP 001193228.1	NAD-dependent epimerase/dehydratase
				YP 001197338.1	NAD-dependent epimerase/dehydratase
				YP 001195718.1	NADH:flavin oxidoreductase
				YP 001194818.1	nicotinate phosphoribosyltransferase
				YP 001194759.1	nitric oxide reductase large subunit-like protein
				YP 001197216.1	nitrilase/cyanide hydratase and apolipoprotein N-acyltransferase
				YP 001196942.1	nitrite reductase (NAD(P)H) large subunit
				YP 001196943.1	nitrite reductase (NAD(P)H) small subunit
				YP 001193777.1	NLP/P60 protein
				YP 001194305.1	NLP/P60 protein
				YP 001197284.1	NLP/P60 protein
				YP 001194111.1	non-specific serine/threonine protein kinase
				YP 001193136.1	NUDIX hydrolase
				YP 001193137.1	NUDIX hydrolase
				YP 001193469.1	NUDIX hydrolase
				YP 001194739.1	NUDIX hydrolase
				YP 001196993.1	NUMOD4 domain-containing protein
				YP 001192613.1	OmpA/MotB domain-containing protein
				YP 001193051.1	OmpA/MotB domain-containing protein
				YP 001193998.1	OmpA/MotB domain-containing protein
				YP 001195748.1	OmpA/MotB domain-containing protein
				YP 001195809.1	OmpA/MotB domain-containing protein
				YP 001194932.1	OsmC family protein
				YP 001195824.1	OsmC family protein
				YP 001196355.1	OsmC family protein
				YP 001194322.1	osmosensitive K+ channel His kinase sensor
				YP 001193663.1	oxidoreductase domain-containing protein
				YP 001196453.1	oxidoreductase domain-containing protein
				YP 001195492.1	PAAR repeat-containing protein
				YP 001193235.1	PAS/PAC sensor protein
				YP 001194871.1	PAS/PAC sensor protein
				YP 001192480.1	PAS/PAC sensor signal transduction histidine kinase
				YP 001194321.1	PAS/PAC sensor signal transduction histidine kinase
				YP 001194618.1	PDZ/DHR/GLGF domain-containing protein
				YP 001194912.1	Pectate lyase/Amb allergen
				YP 001196423.2	pectinesterase
				YP 001193603.1	PepSY-associated TM helix domain-containing protein
				YP 001193428.1	peptidase C45, acyl-coenzyme A:6-aminopenicillanic acid acyl-transferase
				YP 001193902.1	peptidase M1, membrane alanine aminopeptidase
				YP 001193894.1	peptidase M16 domain-containing protein
				YP 001192631.1	peptidase M24
				YP 001192450.1	peptidase S41
				YP 001193628.1	peptidase S41
				YP 001194118.1	peptidoglycan binding domain-containing protein
				YP 001195503.1	peptidoglycan binding domain-containing protein
				YP 001192602.1	peptidoglycan-binding LysM
				YP 001194724.1	peptidoglycan-binding LysM
				YP 001194725.1	peptidoglycan-binding LysM
				YP 001192440.1	periplasmic binding protein
				YP 001194384.1	PH1107-like glycosidase
				YP 001196638.1	PH1107-like glycosidase
				YP 001197273.1	PH1107-like glycosidase
				YP 001194971.1	Phage envelope protein-like protein
				YP 001192552.1	phage shock protein PspC
				YP 001195487.1	phage tail protein
				YP 001195488.1	phage tail protein
				YP 001195486.1	Phage tail sheath protein FI-like protein
				YP 001192843.1	phosphate ABC transporter periplasmic component-like protein
				YP 001194944.1	phosphatidate cytidylyltransferase
				YP 001194192.1	phosphodiesterase I
				YP 001192447.1	phosphoglycerate mutase
				YP 001193430.1	phospholipid/glycerol acyltransferase
				YP 001193931.1	phosphopantetheinyl transferase-like protein
				YP 001197311.1	phosphotransferase domain-containing protein
				YP 001196264.1	phytanoyl-CoA dioxygenase
				YP 001193718.1	phytase
				YP 001193208.1	PhzF family phenazine biosynthesis protein
				YP 001195823.1	pirin
				YP 001193438.1	polysaccharide deacetylase
				YP 001193976.1	polysaccharide deacetylase
				YP 001194326.1	potassium-transporting ATPase subunit A
				YP 001195294.1	prenyltransferase
				YP 001193403.2	protein SprE
				YP 001195685.1	protein-glutamate O-methyltransferase
				YP 001194168.1	Pyrrolo-quinoline quinone
				YP 001194733.1	pyruvate phosphate dikinase
				YP 001193757.1	RagB/SusD domain-containing protein
				YP 001195462.1	RagB/SusD domain-containing protein
				YP 001195585.1	RagB/SusD domain-containing protein
				YP 001196211.1	RagB/SusD domain-containing protein
				YP 001196964.1	RagB/SusD domain-containing protein
				YP 001196990.1	RagB/SusD domain-containing protein
				YP 001193092.1	rare lipoprotein A
				YP 001193848.1	RDD domain-containing protein
				YP 001194580.1	RDD domain-containing protein
				YP 001196472.1	redoxin domain-containing protein
				YP 001195170.1	regulatory protein ArsR
				YP 001195717.1	regulatory protein ArsR
				YP 001194350.1	regulatory protein GntR
				YP 001196544.1	regulatory protein GntR
				YP 001192933.1	response regulator receiver protein
				YP 001195686.1	response regulator receiver protein
				YP 001196083.1	response regulator receiver protein
				YP 001197164.1	response regulator receiver protein
				YP 001195688.1	response regulator receiver sensor signal transduction histidine kinase
				YP 001196543.1	rhamnose-proton symporter
				YP 001193225.1	rhodanese domain-containing protein
				YP 001194969.1	rhodanese domain-containing protein
				YP 001196967.1	rhodanese domain-containing protein
				YP 001195491.1	Rhs element Vgr protein
				YP 001195595.1	Rhs element Vgr protein
				YP 001194815.1	ribonuclease BN
				YP 001195820.1	ribonuclease BN
				YP 001192850.1	ribosomal protein N-acetylase-like protein
				YP 001193471.1	ribulokinase
				YP 001196628.1	RND efflux system outer membrane lipoprotein
				YP 001193682.1	RND family efflux transporter MFP subunit
				YP 001196613.1	RND family efflux transporter MFP subunit
				YP 001196626.1	RND family efflux transporter MFP subunit
				YP 001196952.1	rubredoxin-type Fe(Cys)4 protein
				YP 001197241.1	S23 ribosomal protein
				YP 001197354.1	scramblase
				YP 001196445.1	short chain dehydrogenase
				YP 001196542.1	short chain dehydrogenase
				YP 001192829.1	short-chain dehydrogenase/reductase SDR
				YP 001195689.1	short-chain dehydrogenase/reductase SDR
				YP 001196448.1	short-chain dehydrogenase/reductase SDR
				YP 001196607.1	short-chain dehydrogenase/reductase SDR
				YP 001196427.1	sialate O-acetylesterase
				YP 001197282.1	sialate O-acetylesterase
				YP 001195312.1	signal transduction histidine kinase
				YP 001197163.1	signal transduction histidine kinase
				YP 001194032.1	signal transduction histidine kinase LytS
				YP 001194186.1	signal transduction histidine kinase LytS
				YP 001196610.1	signal transduction histidine kinase LytS
				YP 001196881.1	signal transduction histidine kinase LytS
				YP 001196987.1	signal transduction histidine kinase LytS
				YP 001195397.1	single-strand binding protein/primosomal replication protein n
				YP 001196709.1	single-strand binding protein/primosomal replication protein n
				YP 001197026.1	sodium/hydrogen exchanger
				YP 001196841.1	sodium:dicarboxylate symporter
				YP 001193984.1	sporulation domain-containing protein
				YP 001193464.1	SSS family solute/sodium (Na+) symporter
				YP 001195452.1	SSS family solute/sodium (Na+) symporter
				YP 001196439.1	SSS family solute/sodium (Na+) symporter
				YP 001196660.1	sterol desaturase-like protein
				YP 001196966.1	sterol desaturase-like protein
				YP 001194348.1	sugar (glycoside-Pentoside-hexuronide) transporter
				YP 001197272.1	sugar (glycoside-Pentoside-hexuronide) transporter
				YP 001196449.1	sugar ABC transporter periplasmic protein-like protein
				YP 001196965.1	sulfatase
				YP 001196970.1	sulfatase
				YP 001197341.1	sulfatase
				YP 001197059.1	TatD-related deoxyribonuclease
				YP 001196625.1	TetR family transcriptional regulator
				YP 001193955.1	thiamine biosynthesis protein ThiS
				YP 001193953.1	thiamine monophosphate synthase
				YP 001193951.1	thiamine-phosphate diphosphorylase
				YP 001194455.1	thioesterase superfamily protein
				YP 001192605.1	TonB-dependent receptor
				YP 001193174.1	TonB-dependent receptor
				YP 001193719.1	TonB-dependent receptor
				YP 001194238.1	TonB-dependent receptor
				YP 001195463.1	TonB-dependent receptor
				YP 001196496.1	TonB-dependent receptor
				YP 001196836.1	TonB-dependent receptor
				YP 001192507.1	TonB-dependent receptor, plug
				YP 001192541.1	TonB-dependent receptor, plug
				YP 001192607.1	TonB-dependent receptor, plug
				YP 001193090.1	TonB-dependent receptor, plug
				YP 001193756.1	TonB-dependent receptor, plug
				YP 001193841.1	TonB-dependent receptor, plug
				YP 001194393.1	TonB-dependent receptor, plug
				YP 001195858.1	TonB-dependent receptor, plug
				YP 001196212.1	TonB-dependent receptor, plug
				YP 001196809.1	TonB-dependent receptor, plug
				YP 001196818.1	TonB-dependent receptor, plug
				YP 001196877.1	TonB-dependent receptor, plug
				YP 001196963.1	TonB-dependent receptor, plug
				YP 001196989.1	TonB-dependent receptor, plug
				YP 001194630.1	TonB-dependent siderophore receptor
				YP 001195655.1	TonB-dependent siderophore receptor
				YP 001195701.1	topoisomerase IB-like protein
				YP 001194817.1	transglutaminase domain-containing protein
				YP 001193960.1	translation elongation factor Ts
				YP 001196914.1	tRNA/rRNA methyltransferase SpoU
				YP 001194338.1	two component LuxR family transcriptional regulator
				YP 001195313.1	two component LuxR family transcriptional regulator
				YP 001196946.1	two component LuxR family transcriptional regulator
				YP 001193910.1	two component regulator
				YP 001192825.1	two component sigma-54 specific Fis family transcriptional regulator
				YP 001193683.1	two component sigma-54 specific Fis family transcriptional regulator
				YP 001194328.1	two component sigma-54 specific Fis family transcriptional regulator
				YP 001193971.1	two component transcriptional regulator
				YP 001196839.1	two component transcriptional regulator
				YP 001193863.1	type 11 methyltransferase
				YP 001196938.1	type 11 methyltransferase
				YP 001196949.1	type 11 methyltransferase
				YP 001196137.1	type 12 methyltransferase
				YP 001196957.1	UBA/THIF-type NAD/FAD binding protein
				YP 001197312.1	UDP-phosphate galactose phosphotransferase
				YP 001195049.1	UspA domain-containing protein
				YP 001196870.1	XRE family transcriptional regulator
				YP 001194352.1	xylose isomerase
				YP 001194535.1	xylose isomerase domain-containing protein
				YP 001196404.1	xylose isomerase domain-containing protein
				YP 001196541.1	xylose isomerase domain-containing protein
				YP 001197017.1	Zn-dependent hydrolase
